# Supplementary material for: The antimicrobial activity of free and immobilized poly (diallyldimethylammonium) chloride in nanoparticles of poly (methylmethacrylate)
Source: PubMed Central journal article supplement (PMC4582890; doi:10.1186/s12951-015-0123-3), 2015-09-24
Supplement: 12951_2015_123_MOESM1_ESM.pdf [file 12951_2015_123_MOESM1_ESM.pdf]

# The antimicrobial activity of free and immobilized poly (diallyldimethylammonium) chloride in nanoparticles of poly (methacrylate)

*Luccas Missfeldt Sanches,<sup>1</sup> Denise Freitas Siqueira Petri,<sup>2</sup> Letícia Dias de Melo Carrasco<sup>1,3</sup> and Ana Maria Carmona-Ribeiro<sup>1,3\*</sup>*

**\*Corresponding Author:** Ana Maria Carmona-Ribeiro. Biocolloids Lab, Departamento de Bioquímica, Instituto de Química, Universidade de São Paulo, Caixa Postal 26077, CEP 05513-970, São Paulo SP, Brazil.

<sup>1</sup>Biocolloids Lab, Departamento de Bioquímica, Instituto de Química, Universidade de São Paulo, Caixa Postal 26077, CEP 05513-970, São Paulo SP, Brazil.

<sup>2</sup>Instituto de Química, Universidade de São Paulo, Caixa Postal 26077, CEP 05513-970, São Paulo SP, Brazil.

<sup>3</sup>Departamento de Análises Clínicas e Toxicológicas, Faculdade de Ciências Farmacêuticas, Universidade de São Paulo, CEP 05508-900 São Paulo, Brazil.

**Additional file**

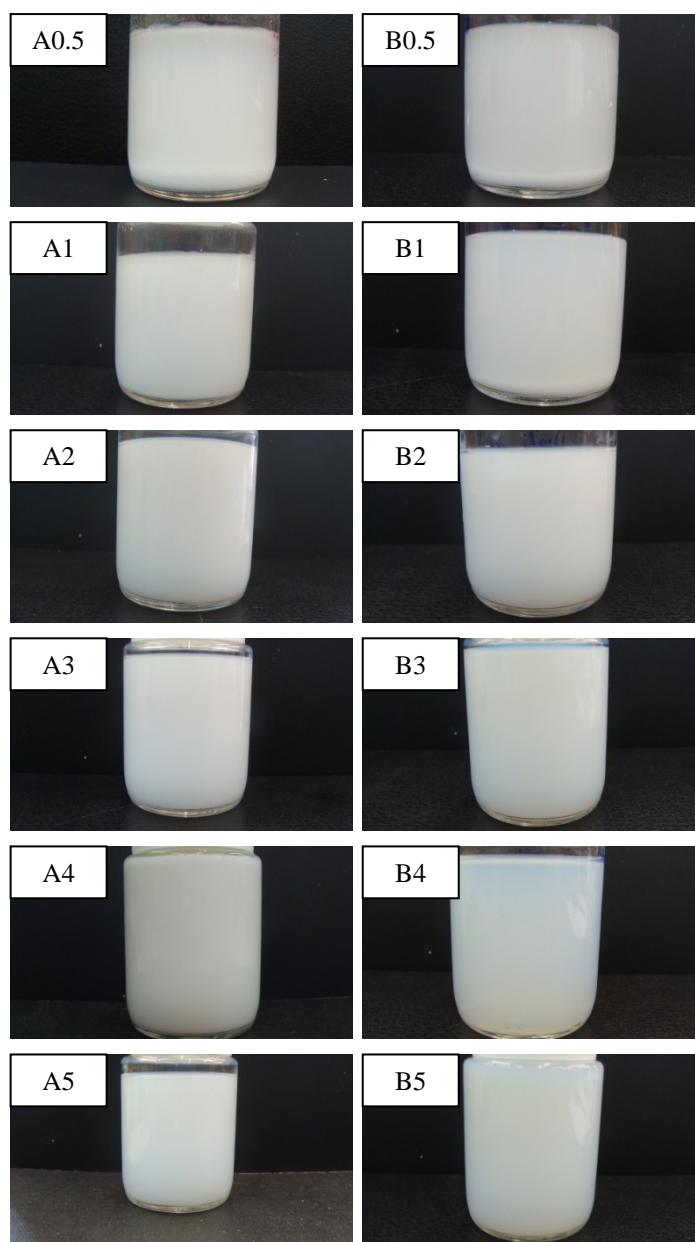

**Fig. S1** Photographs of NPs dispersions immediately after dialysis and synthesis.

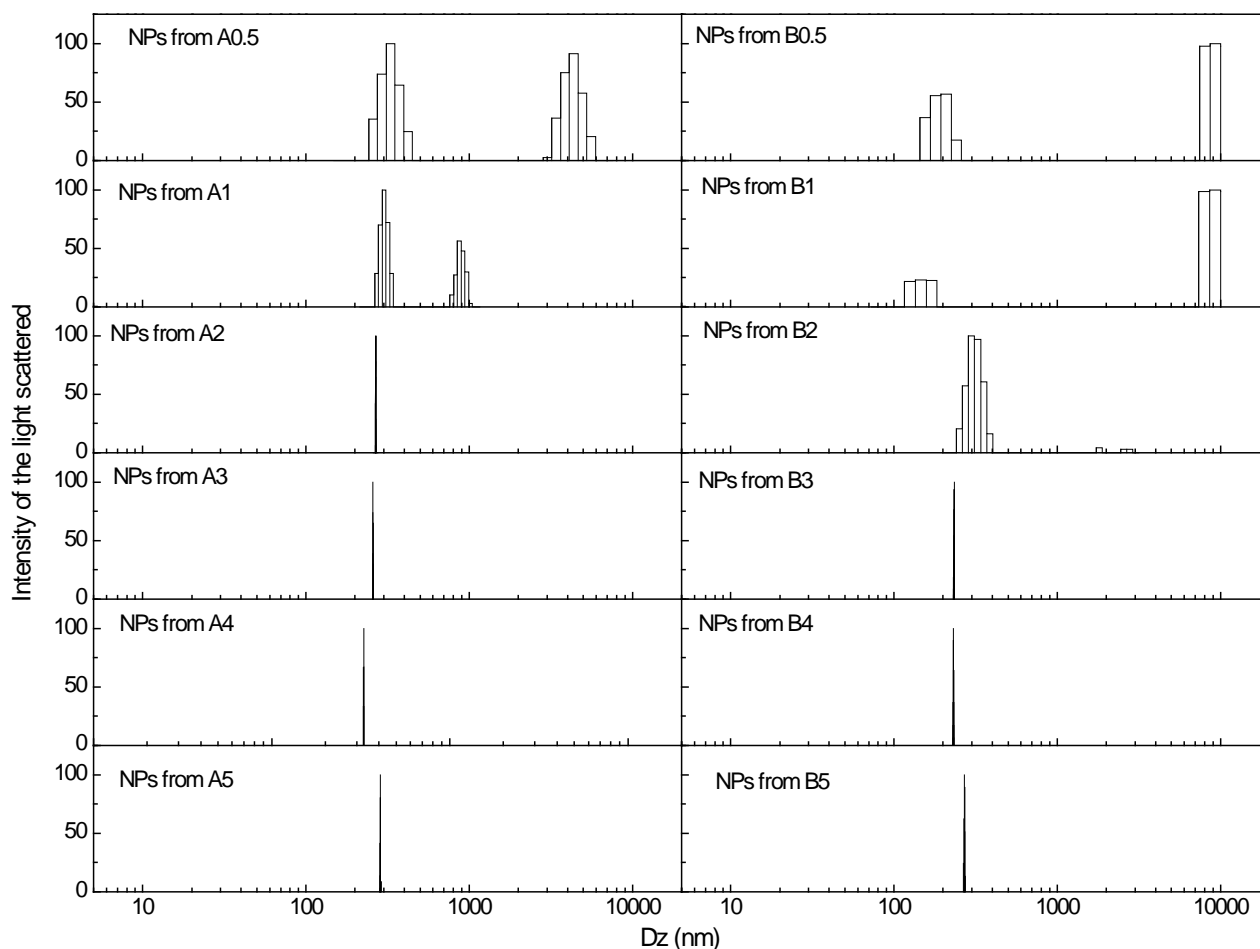

**Fig. S2** Intensity of the light scattered as a function of  $D_z$  (nm) for NPs immediately after synthesis and dialysis.

**Table S1** Data from size exclusion chromatography for determining  $M_w$ ,  $M_n$ , PDI and the degree of polymerization (DP). As products of the polymerization, chains with different lengths are formed so that there will be a distribution of molecular weights. Two molecular weights can be determined from the distributions: the average molecular weight ( $M_w$ ), that is, the total weight of polymer divided by the total number of polymer molecules ( $n$ ), and the pondered molecular weight ( $M_n$ ), which corresponds to the pondered sum of molecular weights divided by the total weight.

| NPs       | $M_w$<br>(g/mol) | $M_n$<br>(g/mol) | PDI   | DP    |
|-----------|------------------|------------------|-------|-------|
| <b>A3</b> | 1,173,000        | 810643           | 1.447 | 11716 |
| <b>A4</b> | 1,065,000        | 430129           | 2.476 | 10650 |
| <b>A5</b> | 2,872,000        | 1752288          | 1.639 | 28686 |
| <b>B3</b> | 1,514,000        | 933416           | 1.622 | 15122 |
| <b>B4</b> | 2,362,000        | 1711594          | 1.380 | 23592 |
| <b>B5</b> | 2,056,000        | 1113759          | 1.846 | 20535 |

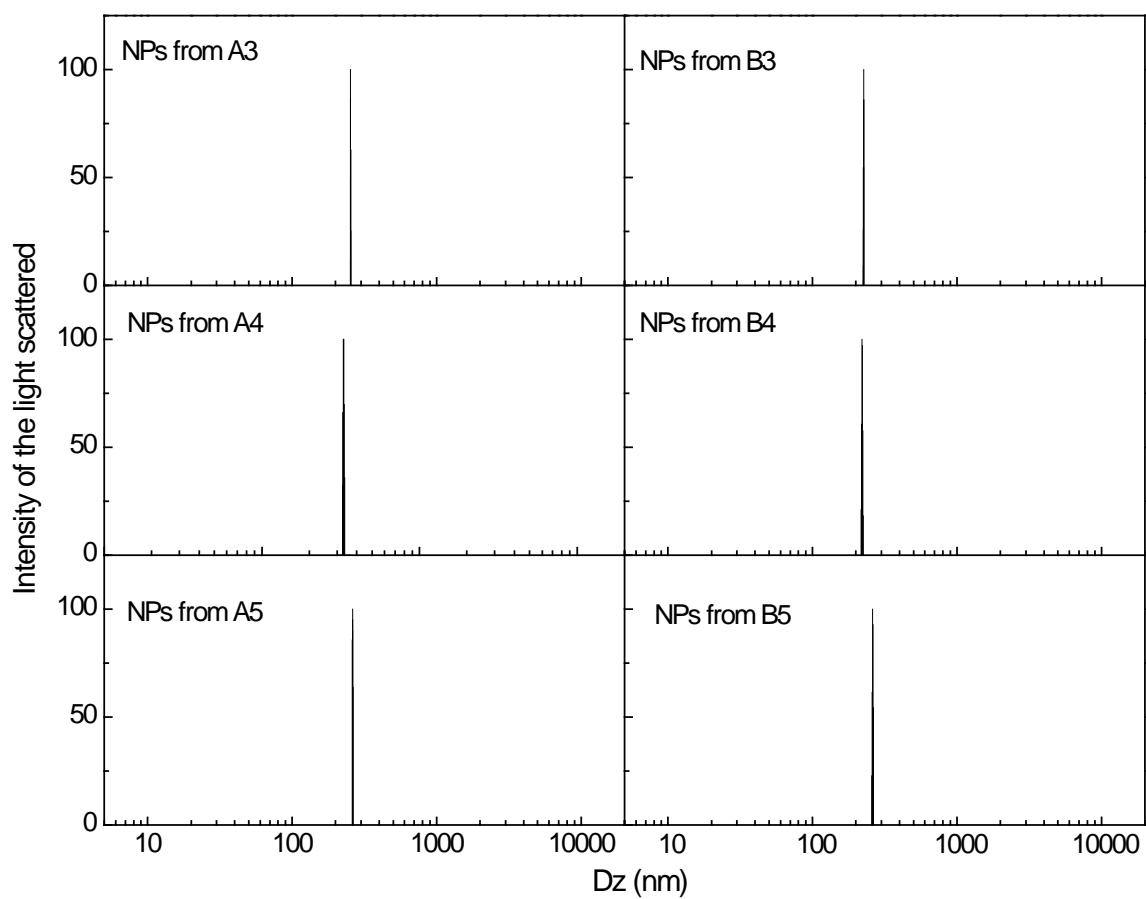

**Fig. S3** Intensity of the light scattered as a function of  $D_z$  (nm) for NPs 2 years after the synthesis. The data illustrate the high colloidal stability of the dispersions.
